# Supplementary material
Source: PubMed Central journal article supplement (PMC4670812)
Supplement: NIHMS708392-supplement-supplement_1.pdf [file NIHMS708392-supplement-supplement_1.pdf]

**Supplementary Table 1. Incidence of condyloma<sup>a</sup> by HPV type detected in the lesion among men<sup>b</sup> with the same HPV type detected at the genitals either as a prevalent or incident infection**

| HPV Type <sup>c</sup> | Prevalent Genital HPV Infection         |                          |                      |                      |                                 | Incident Genital HPV Infection          |                          |                      |                      |                                 |
|-----------------------|-----------------------------------------|--------------------------|----------------------|----------------------|---------------------------------|-----------------------------------------|--------------------------|----------------------|----------------------|---------------------------------|
|                       | Incidence Rate <sup>d</sup><br>(95% CI) | Cumulative Incidence (%) |                      |                      | Median time to EGL <sup>e</sup> | Incidence Rate <sup>d</sup><br>(95% CI) | Cumulative Incidence (%) |                      |                      | Median time to EGL <sup>e</sup> |
|                       |                                         | 6-Month<br>(95% CI)      | 12-Month<br>(95% CI) | 24-Month<br>(95% CI) |                                 |                                         | 6-Month<br>(95% CI)      | 12-Month<br>(95% CI) | 24-Month<br>(95% CI) |                                 |
| Any                   | 1.3 (1.0-1.6)                           | 0.9 (0.4- 1.3)           | 2.4 (1.6-3.1)        | 3.4 (2.5-4.3)        | 7.6                             | 0.9 (0.6-1.2)                           | 0.5 (0.2-0.8)            | 1.2 (0.7-1.7)        | 2.1 (1.4-2.8)        | 7.7                             |
| Vaccine <sup>f</sup>  | 5.3 (3.9-7.0)                           | 3.9 (2.0-5.8)            | 9.7 (6.7-12.8)       | 13.5 (9.8-17.2)      | 7.1                             | 4.0 (2.7-5.6)                           | 2.0 (0.7-3.3)            | 5.1 (2.9-7.2)        | 8.9 (5.7-12.1)       | 8.2                             |
| High Risk             | 0.3 (0.1-0.6)                           | 0.1 (0.0-0.3)            | 0.6 (0.1-1.1)        | 0.8 (0.2-1.3)        | 8.1                             | 0.3 (0.1-0.5)                           | 0.2 (0.0-0.5)            | 0.4 (0.0-0.8)        | 0.8 (0.1-1.4)        | 7.4                             |
| 16                    | 0.7 (0.1-2.0)                           | 0.0 (0.0-0.0)            | 1.2 (0.3-4.8)        | 2.0 (0.6-6.1)        | 6.4                             | 0.3 (0.0-1.5)                           | 0.0 (0.0-0.0)            | 0.7 (0.1-4.5)        | 0.7 (0.1-4.5)        | 8.3                             |
| 18                    | 0.6 (0.0-3.3)                           | 1.6 (0.2-10.9)           | 1.6 (0.2-10.9)       | 1.6 (0.2-10.9)       | 5.7                             | 0.0 (0.0-2.5)                           | 0.0 (0.0-0.0)            | 0.0 (0.0-0.0)        | 0.0 (0.0-0.0)        | NE                              |
| 31                    | 0.0 (0.0-2.9)                           | 0.0 (0.0-0.0)            | 0.0 (0.0-0.0)        | 0.0 (0.0-0.0)        | NE                              | 0.9 (0.0-4.8)                           | 1.6 (0.2-10.9)           | 1.6 (0.2-10.9)       | 1.6 (0.2-10.9)       | 5.7                             |
| 39                    | 0.0 (0.0-1.6)                           | 0.0 (0.0-0.0)            | 0.0 (0.0-0.0)        | 0.0 (0.0-0.0)        | NE                              | 0.4 (0.0-2.2)                           | 0.7 (0.1-5.2)            | 0.7 (0.1-5.2)        | 0.7 (0.1-5.1)        | 1.0                             |
| 45                    | 0.0 (0.0-3.0)                           | 0.0 (0.0-0.0)            | 0.0 (0.0-0.0)        | 0.0 (0.0-0.0)        | NE                              | 0.6 (0.0-3.4)                           | 0.0 (0.0-0.0)            | 0.0 (0.0-0.0)        | 3.2 (0.5-20.8)       | 23.9                            |
| 51                    | 0.2 (0.0-1.2)                           | 0.0 (0.0-0.0)            | 0.6 (0.1-4.4)        | 0.6 (0.1-4.4)        | 8.4                             | 0.3 (0.0-1.5)                           | 0.0 (0.0-0.0)            | 0.0 (0.0-0.0)        | 1.1 (0.2-7.5)        | 17.9                            |
| 52                    | 1.0 (0.2-3.0)                           | 0.0 (0.0-0.0)            | 2.0 (0.5-7.7)        | 2.0 (0.5-7.7)        | 9.2                             | 0.3 (0.0-1.6)                           | 0.0 (0.0-0.0)            | 0.7 (0.1-4.8)        | 0.7 (0.1-4.8)        | 7.4                             |
| 56                    | 0.0 (0.0-2.5)                           | 0.0 (0.0-0.0)            | 0.0 (0.0-0.0)        | 0.0 (0.0-0.0)        | NE                              | 0.8 (0.0-4.5)                           | 1.7 (0.2-11.2)           | 1.7 (0.2-11.2)       | 1.7 (0.2-11.2)       | 0.4                             |
| Low Risk              | 2.6 (1.9-3.4)                           | 1.9 (1.0-2.9)            | 4.7 (3.2-6.2)        | 7.0 (5.0-9.0)        | 7.5                             | 1.6 (1.1-2.3)                           | 0.8 (0.3-1.4)            | 2.2 (1.3-3.2)        | 3.8 (2.4-5.2)        | 8.0                             |
| 6                     | 15.1 (10.7-26.1)                        | 9.3 (5.3-16.2)           | 22.5 (15.8-31.5)     | 32.4 (24.2-42.5)     | 7.5                             | 9.8 (6.1-15.1)                          | 2.5 (0.8-7.6)            | 10.3 (5.8-17.9)      | 20.1 (12.9-30.6)     | 10.8                            |
| 11                    | 12.7 (5.1-26.1)                         | 12.0 (4.0-32.7)          | 29.6 (15.3-52.4)     | 29.6 (15.3-52.4)     | 6.7                             | 13.5 (6.5-24.8)                         | 12.5 (5.8-25.7)          | 17.8 (9.2-32.7)      | 26.4 (14.4-45.4)     | 3.7                             |
| 40                    | 0.0 (0.0-3.2)                           | 0.0 (0.0-0.0)            | 0.0 (0.0-0.0)        | 0.0 (0.0-0.0)        | NE                              | 0.8 (0.0-4.6)                           | 0.0 (0.0-0.0)            | 1.8 (0.2-11.8)       | 1.8 (0.2-11.8)       | 6.9                             |
| 53                    | 0.5 (0.1-1.7)                           | 0.6 (0.1-4.5)            | 0.6 (0.1-4.5)        | 1.6 (0.4-6.4)        | 11.1                            | 0.0 (0.0-1.0)                           | 0.0 (0.0-0.0)            | 0.0 (0.0-0.0)        | 0.0 (0.0-0.0)        | NE                              |
| 54                    | 0.4 (0.0-2.3)                           | 0.0 (0.0-0.0)            | 1.2 (0.2-8.3)        | 1.2 (0.2-8.3)        | 7.8                             | 0.0 (0.0-1.5)                           | 0.0 (0.0-0.0)            | 0.0 (0.0-0.0)        | 0.0 (0.0-0.0)        | NE                              |
| 66                    | 0.6 (0.1-2.0)                           | 0.0 (0.0-0.0)            | 0.0 (0.0-0.0)        | 2.0 (0.5-7.8)        | 15.0                            | 0.2 (0.0-1.3)                           | 0.0 (0.0-0.0)            | 0.6 (0.1-4.0)        | 0.6 (0.1-4.0)        | 8.9                             |

Abbreviation: CI-confidence interval. NE-not estimable.

<sup>a</sup>DNA detected using Linear Array. <sup>b</sup>Newly acquired-pathologically confirmed condyloma/suggestive of condyloma. <sup>c</sup>HPV types 33/35/58/59/26/68/69/71/70/73/82 did not progress to a condyloma lesion and therefore incidence rates and cumulative incidence could not be calculated. <sup>d</sup>Incidence rate is cases per 1000 person-months. <sup>e</sup>Follow-up time in months. <sup>f</sup>Vaccine HPV types 6/11/16/18

**Supplementary Table 2. HPV types detected within 161 condylomas**

|                                  | <b>n</b> | <b>%</b> |
|----------------------------------|----------|----------|
| <b>Single infections</b>         |          |          |
| <b>HPV 6</b>                     | 90       | 0.56     |
| <b>HPV 11</b>                    | 33       | 0.20     |
| <b>HPV 16</b>                    | 1        | 0.01     |
| <b>HPV45</b>                     | 1        | 0.01     |
| <b>Coinfections</b>              |          |          |
| <b>HPV 6+ other HPV</b>          | 16       | 0.10     |
| <b>HPV 11+ other HPV</b>         | 8        | 0.05     |
| <b>HPV 6 and 11+</b>             | 4        | 0.02     |
| <b>HPV 6, 11 and other HPV</b>   | 4        | 0.02     |
| <b>Other HPV without 6 or 11</b> | 4        | 0.02     |
